# Supplementary material for: Spatial control of the APC/C ensures the rapid degradation of cyclin B1
Source: PubMed Central journal article supplement (PMC11445581; doi:10.1038/s44318-024-00194-2), 2024-08-14
Supplement: 44318_2024_194_MOESM1_ESM.pdf [file 44318_2024_194_MOESM1_ESM.pdf]

1 ***Spatial control of the APC/C ensures the rapid degradation of Cyclin B1***  
2 Luca Cirillo\*, Rose Young\*, Sapthaswaran Veerapathiran, Annalisa Roberti, Molly Martin, Azzah  
3 Abubacar, Camilla Perosa, Catherine Coates, Reyhan Muhammad, Theodoros I. Roumeliotis, Jyoti  
4 S. Choudhary, Claudio Alfieri<sup>+</sup>, and Jonathon Pines<sup>+</sup>  
5  
6

7 APPENDIX  
8

9 TABLE OF CONTENT

|    |                            |
|----|----------------------------|
| 10 |                            |
| 11 | Appendix Figure S1.....pg2 |
| 12 | Appendix Figure S2.....pg3 |
| 13 | Appendix Figure S3.....pg4 |
| 14 | Appendix Figure S4.....pg5 |
| 15 | Appendix Figure S5.....pg6 |
| 16 | Appendix Figure S6.....pg8 |
| 17 |                            |
| 18 | Appendix Table S1.....pg10 |
| 19 | Appendix Table S2.....pg11 |
| 20 | Appendix Table S3.....pg12 |
| 21 |                            |
| 22 |                            |
| 23 |                            |
| 24 |                            |

25 **Appendix Figure S1**

A)

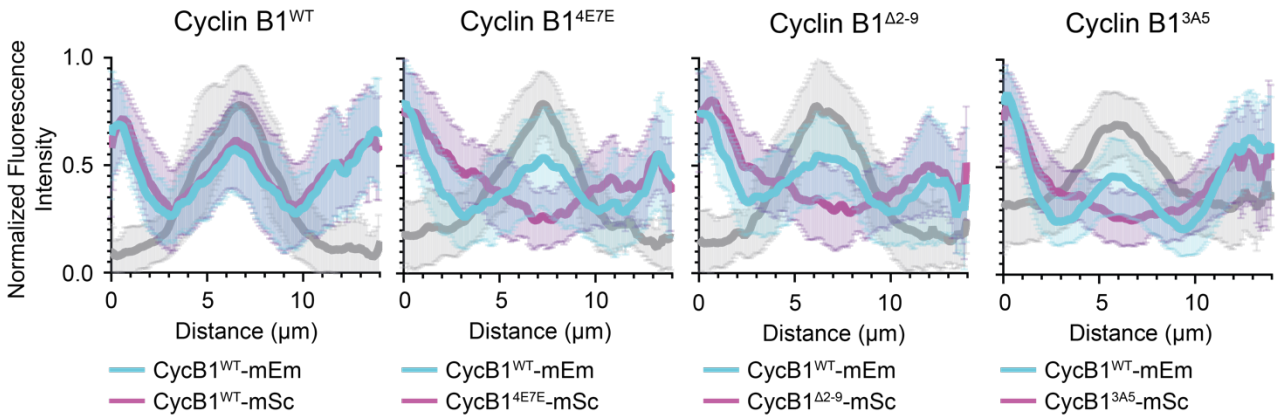

B)

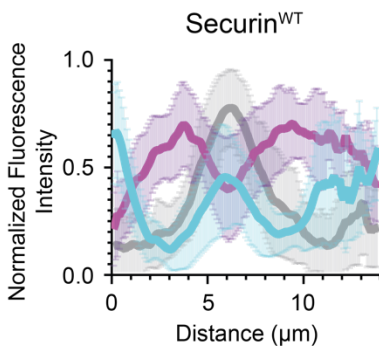

Endogenous Ectopic  
CycB1-mEm Securin-mSc

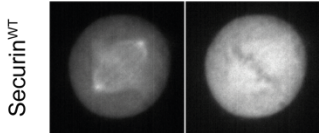

C)

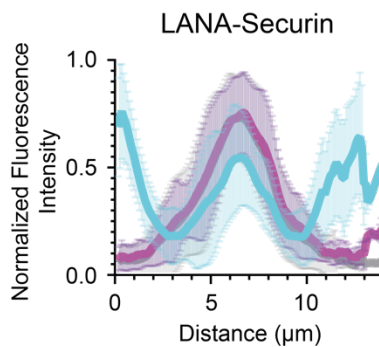

Endogenous Ectopic  
CycB1-mEm Securin-mSc

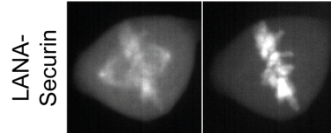

D)

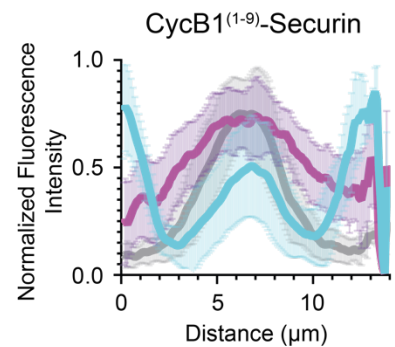

Endogenous Ectopic  
CycB1-mEm Securin-mSc

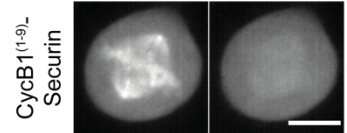

26

27

**Appendix Figure S1. Subcellular localization of Cyclin B1<sup>Δ2-9</sup> and Cyclin B1<sup>3A5</sup>**

28

A) Graphs representing the pixel-by-pixel fluorescence intensity along a line going from centrosome to centrosome of RPE-1 Cyclin B1-mEmerald<sup>+/+</sup> cells ectopically expressing the indicated variant of Cyclin B1-mScarlet. Cyan: endogenous Cyclin B1-mEmerald, Magenta: ectopically expressed Cyclin B1-mScarlet, Grey: siR-DNA: n ≥ 21 cells per condition, N = 3 independent experiments. Mean ± Standard Deviation .

33

B, C, D) Top: Graphs representing the pixel-by-pixel fluorescence intensity along a line going from centrosome to centrosome of RPE-1 Cyclin B1-mEmerald<sup>+/+</sup> cells ectopically expressing the indicated variant of Securin-mScarlet. Cyan: endogenous Cyclin B1-mEmerald, Magenta: ectopically expressed Securin-mScarlet, Grey: siR-DNA. Bottom: Maximum projections of representative confocal images used for line profile quantification. Scale bar represents 10 μm. N ≥ 16 cells per condition, N = 3 independent experiments. Mean ± Standard Deviation are plotted.

39

40 **Appendix Figure S2**

A)

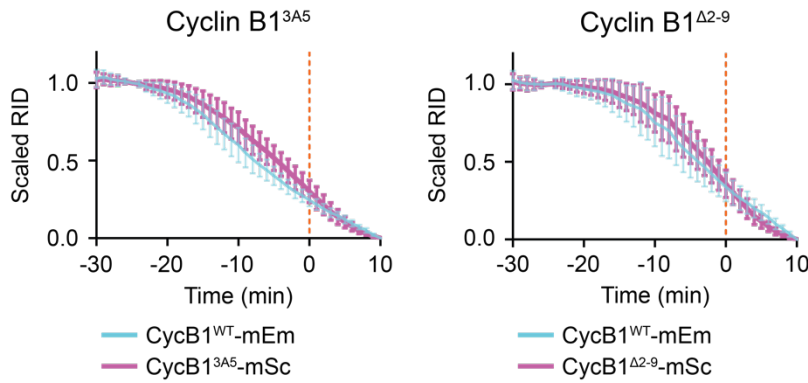

B)

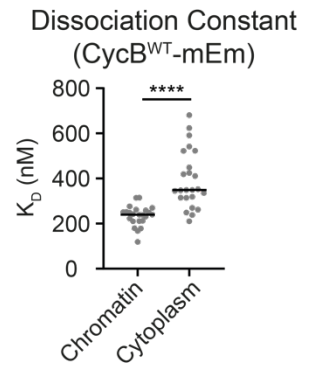

C)

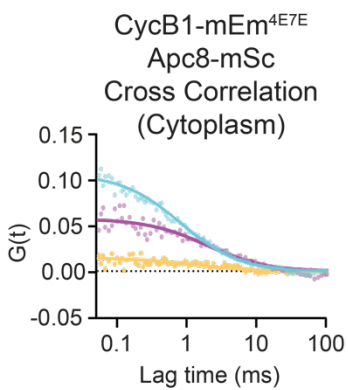

D)

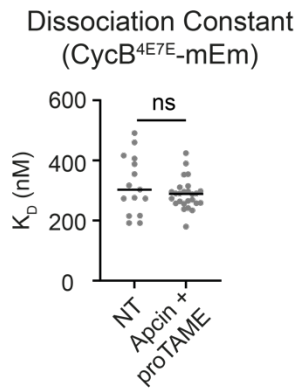

41

42 **Appendix Figure S2. Degradation of Cyclin B1 mutants and APC8 interaction**

43 A) Cyclin B1 degradation graphs representing the fluorescence intensity of Cyclin B1 over  
44 time for cells ectopically expressing the indicated Cyclin B1 variants:  $n \geq 16$  cells per  
45 condition,  $N \geq 3$  independent experiments. Mean  $\pm$  Standard Deviation are plotted.

46 B) Dot plot representing the KD values measured for Cyclin B1<sup>WT</sup>-mEmerald and APC8-  
47 mScarlet by FCCS at different subcellular locations:  $n = 23$  cells,  $N = 3$  independent  
48 experiments.

49 C) Representative graph of the autocorrelation function of mEmerald and mScarlet and the  
50 cross-correlation function between the two in RPE-1 APC8-mScarlet<sup>+/+</sup> ectopically  
51 expressing Cyclin B1<sup>4E7E</sup>-mEmerald.

52 D) Dot plot representing the KD values measured for Cyclin B1<sup>4E7E</sup>-mEmerald and APC8-  
53 mScarlet by FCCS before and after a treatment with APCin and proTAME:  $n \geq 15$  cells,  $N =$   
54 3 independent experiments.

55

56

57 **Appendix Figure S3**

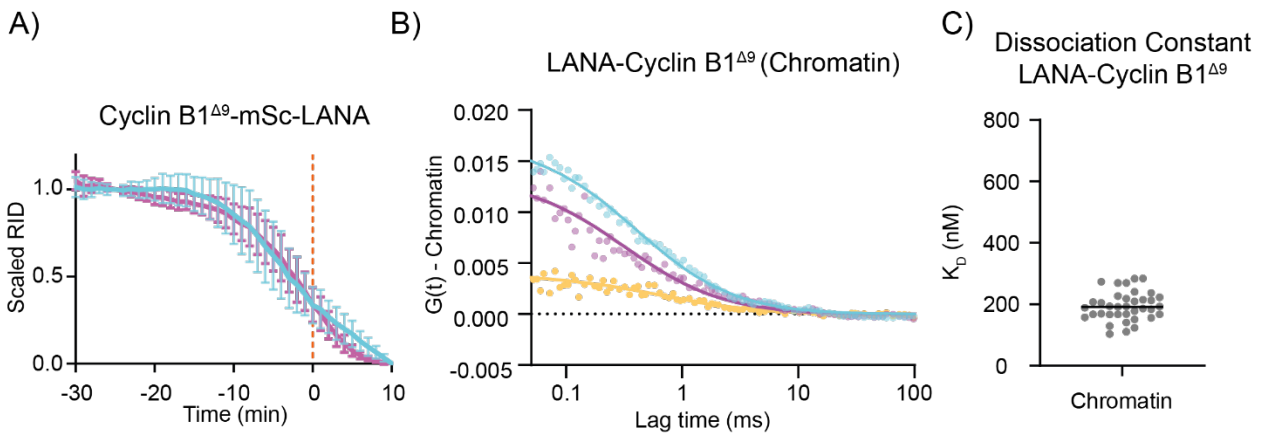

58  
59 **Appendix Figure S3. Degradation of Cyclin B1<sup>Δ9</sup>-LANA and FCCS of LANA-Cyclin**  
60 **B1<sup>Δ9</sup> -mEmerald and APC8-mScarlet interaction.**

61 A) Cyclin B1 degradation graphs representing the fluorescence intensity of Cyclin B1 over  
62 time for cells ectopically expressing the indicated Cyclin B1 variant: n = 19 cells, N = 2  
63 independent experiments. Mean ± Standard Deviation are plotted.

64 B) Representative graph of the autocorrelation function of mEmerald and mScarlet and the  
65 cross-correlation function between the two in RPE-1 APC8-mScarlet<sup>+/+</sup> ectopically  
66 expressing LANA-Cyclin B1<sup>Δ9</sup>-mEmerald.

67 C) Dot plot representing the KD values measured for LANA-Cyclin B1<sup>Δ9</sup>-mEmerald and  
68 APC8-mScarlet by FCCS in metaphase cells. N = 3 independent experiments.

69

70 **Appendix Figure S4**

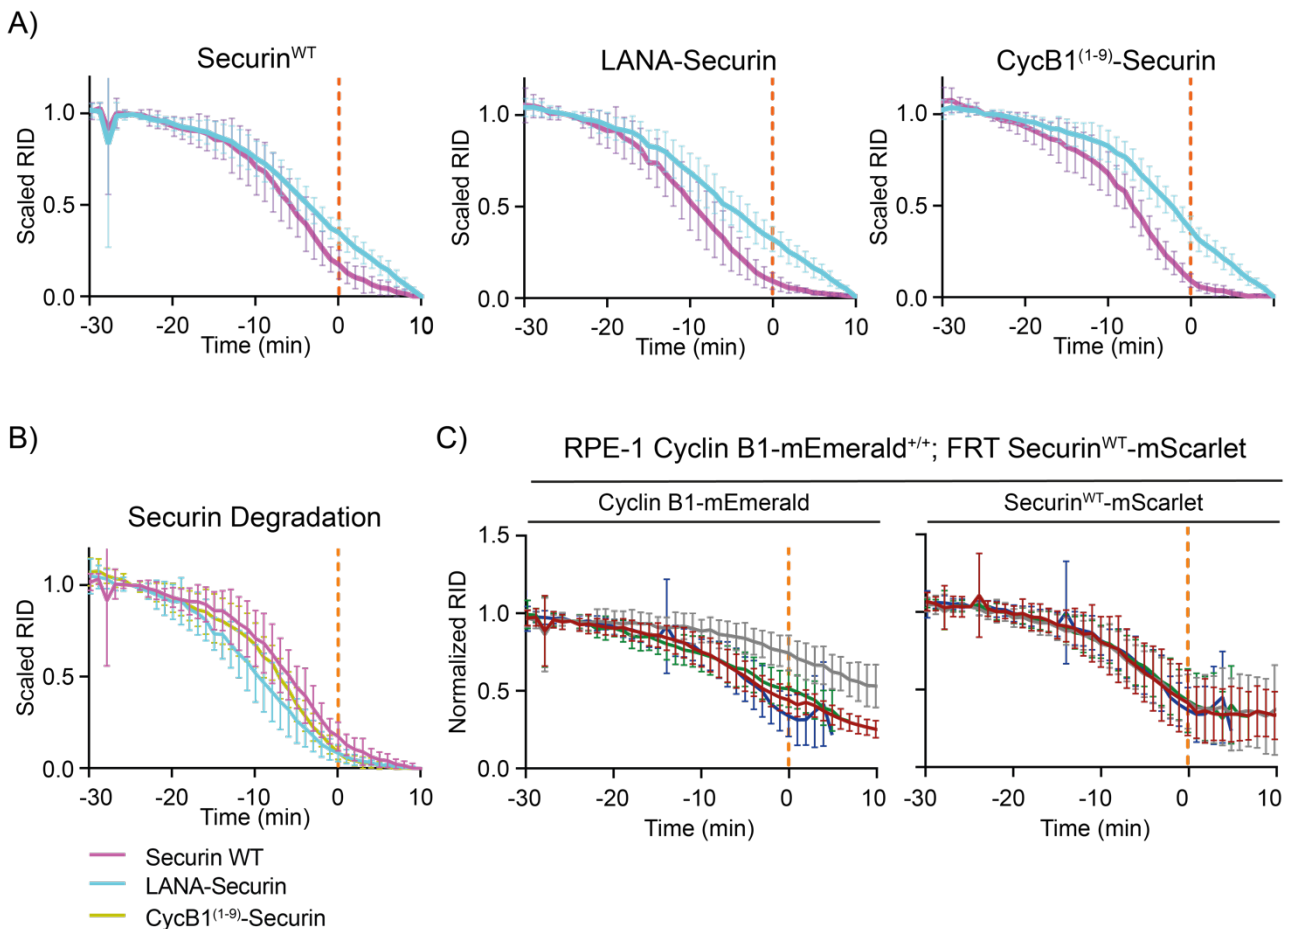

71

72

**Appendix Figure S4. Localising Securin at the chromatin enhances its degradation**

73 A) Securin degradation graphs representing the fluorescence intensity of Cyclin B1 over  
 74 time for cells ectopically expressing the indicated Securin variants. Cyan: endogenous  
 75 Cyclin B1-mEmerald, magenta: ectopic Securin:  $n \geq 8$  cells per condition,  $N = 3$  independent  
 76 experiments. Mean  $\pm$  Standard Deviation are plotted.

77 B) Securin degradation graph directly comparing the data for Securin degradation shown in  
 78 A. Mean  $\pm$  Standard Deviation are plotted.

79 C) Quantification of normalised Cyclin B1 and Securin fluorescence levels over time  
 80 measured in RPE-1 CCNB1-mEmerald<sup>+/+</sup> cells ectopically expressing Securin-mScarlet:  $n$   
 81 = 12 cells,  $N = 3$  independent experiments. Mean  $\pm$  Standard Deviation are plotted.  
 82

83 **Appendix Figure S5**

A)

| Clone | TP53 gene              |                                            | p53 protein           |
|-------|------------------------|--------------------------------------------|-----------------------|
| 7A11  | 1 <sup>st</sup> allele | G613_614insTGGAGT                          | E204_Y205insLE        |
|       | 2 <sup>nd</sup> allele | A578G; G609_610insAAGTTG                   | H193R; V203_E204insKL |
| 7H10  | 1 <sup>st</sup> allele | G605_606insATTTGCG                         | V203FfsX8             |
|       | 2 <sup>nd</sup> allele | T613_614insGGAAATTTGCGTGTGGAGT             | Y205WfsX10            |
| B1H3  | 1 <sup>st</sup> allele | G596_597insTGGAAGG                         | N200GfsX11            |
|       | 2 <sup>nd</sup> allele | G587_593del; G587_588insGAAATTTGCGTGTGGAGT | V197KfsX17            |

B)

| Clone | TP53 gene              |                             | p53 protein  |
|-------|------------------------|-----------------------------|--------------|
| 9B2   | 1 <sup>st</sup> allele | G595_598del                 | G199ifsX47   |
|       | 2 <sup>nd</sup> allele | A611_612insAATTTGCGTGTGGA   | Y205ifsX46   |
| 9B3   | 1 <sup>st</sup> allele | T608_609insAAGGAAATTTGCGTGT | E204RfsX9    |
|       | 2 <sup>nd</sup> allele | G589_595del                 | R196_E198del |

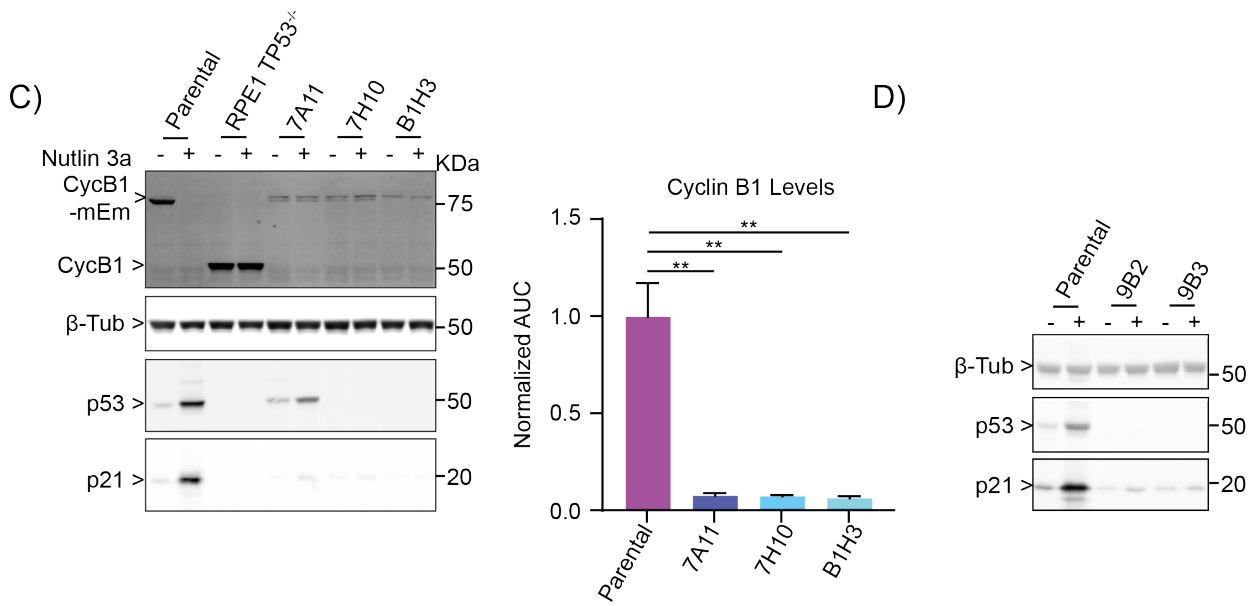

84  
85  
86  
87

88 **Appendix Figure S5. Characterization of RPE-1 CCNB1<sup>4E7E</sup>-mEmerald<sup>+/+</sup>; TP53<sup>-/-</sup> cells**  
89 A) Table recapitulating the sequencing of TP53 gene in RPE-1 CCNB1<sup>4E7E</sup>-mEmerald<sup>+/+</sup>  
90 clones.  
91 B) Table recapitulating the sequencing of TP53 gene in RPE-1 CCNB1-mEmerald<sup>+/+</sup> clones.  
92 C) Right: representative immunoblot of cell lysates from parental RPE-1 CCNB1-  
93 mEmerald<sup>+/+</sup>, RPE-1 TP53<sup>-/-</sup> or RPE-1 CCNB1<sup>4E7E</sup>-mEmerald<sup>+/+</sup> clones, either treated for 24  
94 hr with Nutlin3a, or left untreated. Left: Bar graph representing the quantification of the  
95 immunoblot of Cyclin B1. N = 2 independent experiments. Mean ± Standard Deviation.  
96 D) Representative immunoblot of cell lysates from parental RPE-1 CCNB1-mEmerald<sup>+/+</sup> or  
97 RPE-1 CCNB1-mEmerald<sup>+/+</sup>; TP53<sup>-/-</sup> clones, either treated for 24h with Nutlin3a, or left  
98 untreated.  
99 E) Bar graph representing the quantification of the cell cycle profiles of parental RPE-1  
100 CCNB1-mEmerald<sup>+/+</sup>, RPE-1 TP53<sup>-/-</sup> or RPE-1 CCNB1<sup>4E7E</sup>-mEmerald<sup>+/+</sup> clones, either  
101 treated for 24h with Nutlin3a, or untreated. N = 2 independent experiments. Mean ± Range.  
102 F) Bar graph representing the quantification of the cell cycle profiles of parental RPE-1  
103 CCNB1-mEmerald<sup>+/+</sup> or RPE-1 CCNB1-mEmerald<sup>+/+</sup>; TP53<sup>-/-</sup> clones, either treated for 24h  
104 with Nutlin3a, or left untreated. N = 2 independent experiments. Mean ± Range.

105

106 **Appendix Figure S5 – Supplementary text**

107 *Nutlin-3A increased p21 levels in the parental cells, and Cyclin B1 levels decreased as a*  
108 *consequence of cell cycle arrest. We did not detect significant changes in p21 or Cyclin B1*  
109 *levels in any of the 4E7E p53<sup>-/-</sup> mutant clones, nor in control RPE-1 TP53<sup>-/-</sup> cells (Chiang et*  
110 *al., 2019) (Appendix Fig. S5C, D). Flow cytometry analysis of PI-stained cells indicated a*  
111 *robust accumulation of 2n and 4n parental cells following Nutlin-3A treatment, indicative of*  
112 *a p53-dependent cell cycle arrest, whereas RPE-1 TP53<sup>-/-</sup>, Cyclin B1<sup>4E7E</sup> clones and TP53<sup>-/-</sup>*  
113 *clones displayed no signs of cell cycle arrest (Appendix Fig. S5E, F). In unperturbed*  
114 *conditions, Cyclin B1<sup>4E7E</sup> clones and TP53<sup>-/-</sup> clones did not show any significant variation in*  
115 *cell cycle progression (Appendix Fig. S5E, F).*

116

117 **Appendix Figure S6**

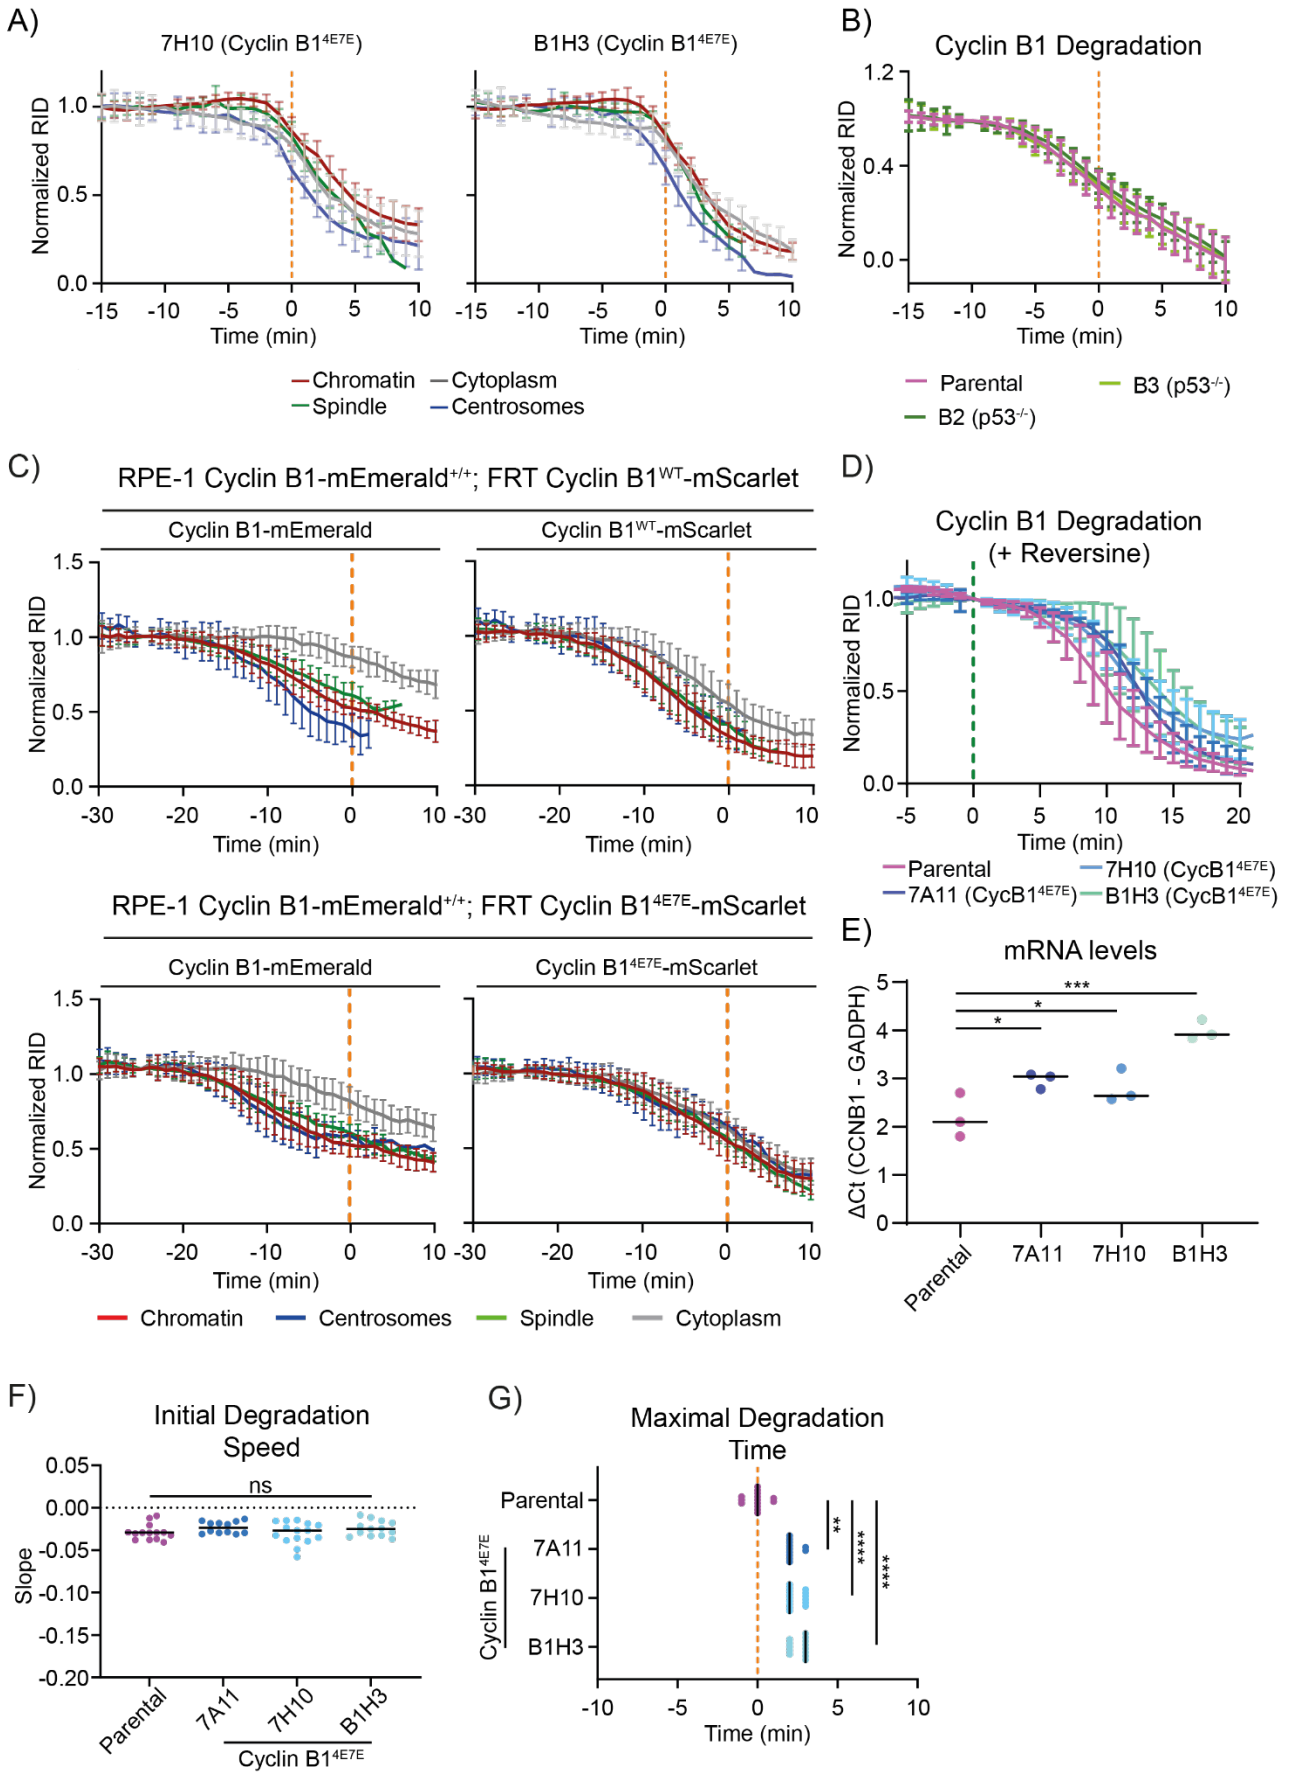



120 **Appendix Figure S6. Degradation analysis of Cyclin B1<sup>4E7E</sup>**  
121 A, B) Cyclin B1 degradation graphs representing the fluorescence intensity of Cyclin B1 over  
122 time of RPE-1 Cyclin B1-mEmerald<sup>+/+</sup> compared to Cyclin B1<sup>4E7E</sup> clones or p53<sup>-/-</sup> clones.  
123 Mean ± Standard Deviation are plotted.  
124 C) Quantification of normalised Cyclin B1 fluorescence levels over time measured by  
125 spinning disk fluorescence microscopy in RPE-1CCNB1-mEmerald<sup>+/+</sup> cells ectopically  
126 expressing the indicated Cyclin-mScarlet B1 variant: n ≥ 18 cells per condition, N = 3  
127 independent experiments. Mean ± Standard Deviation are plotted.  
128 D) Cyclin B1 degradation graph representing the fluorescence intensity of Cyclin B1 over  
129 time of RPE-1 Cyclin B1-mEmerald<sup>+/+</sup> compared to Cyclin B1<sup>4E7E</sup> clones or p53<sup>-/-</sup> clones,  
130 following exposure to Reversine. Green dotted line indicates nuclear envelope breakdown.  
131 Mean ± Standard Deviation are plotted.  
132 E) Dot plots representing the mRNA levels in RPE-1 Cyclin B1-mEmerald<sup>+/+</sup> compared to  
133 Cyclin B1<sup>4E7E</sup> clones. Ct = Cycle threshold.  
134 F, G) Dot plots representing the initial degradation speed (D) or the maximal degradation  
135 time (E) of RPE-1 Cyclin B1-mEmerald<sup>+/+</sup> compared to Cyclin B1<sup>4E7E</sup> clones.  
136

137 **Appendix Table S1**

| Subcellular Location | Concentration (apparent) of CyclinB1-mEmerald | Concentration (apparent) of APC8-mScarlet | Dissociation Constant (apparent) |
|----------------------|-----------------------------------------------|-------------------------------------------|----------------------------------|
| Chromosomes          | 120 ± 13 nM                                   | 103 ± 10 nM                               | 83 ± 40 nM                       |
| Cytoplasm            | 59 ± 8.5 nM                                   | 99 ± 12 nM                                | 176 ± 62 nM                      |
| Spindle Fibres       | 92 ± 7.5 nM                                   | 103 ± 11 nM                               | 71 ± 31 nM                       |
| Spindle Poles        | 141 ± 17 nM                                   | 98 ± 11 nM                                | 81 ± 19 nM                       |

138 **Appendix Table S1. Concentrations of Cyclin B1-mEmerald and APC8-mScarlet at**  
 139 **different subcellular locations. Mean ± Standard Deviation.**

140  
 141  
 142  
 143  
 144  
 145  
 146  
 147  
 148  
 149  
 150  
 151  
 152  
 153  
 154  
 155  
 156  
 157  
 158  
 159  
 160

161 **Appendix Table S2**

| Figure   | Mean difference (p value) |        | Multiple comparison (p value) |         | Statistical Test                           |
|----------|---------------------------|--------|-------------------------------|---------|--------------------------------------------|
|          |                           |        |                               |         |                                            |
| Fig 1H   | <0.0001                   |        | Cytoplasm vs. Chromatin       | <0.0001 | Kruskal-Wallis; Dunn's Multiple Comparison |
|          |                           |        | Cytoplasm vs. Spindle         | <0.0001 |                                            |
|          |                           |        | Cytoplasm vs. Centrosomes     | <0.0001 |                                            |
| Fig 1I   | 0.3435                    |        |                               |         | one-way ANOVA                              |
| Fig 1J   | 0.2348                    |        |                               |         | unpaired t-test                            |
| Fig 7E   | <0.0001                   |        | Parental vs 7A11              | <0.0001 | Welch's ANOVA; Dunn's Multiple Comparison  |
|          |                           |        | Parental vs 7H10              | <0.0001 |                                            |
|          |                           |        | Parental vs B1H3              | <0.0001 |                                            |
| Fig 7F   | 0.075                     |        |                               |         | Kruskal-Wallis                             |
| Fig 7G   | <0.0001                   |        | Parental vs 7A11              | 0.016   | Kruskal-Wallis; Dunn's Multiple Comparison |
|          |                           |        | Parental vs 7H10              | <0.0001 |                                            |
|          |                           |        | Parental vs B1H3              | <0.0001 |                                            |
| Fig S1C  | top left                  | 0.936  |                               |         | one-way ANOVA                              |
|          | top right                 | 0.629  |                               |         | one-way ANOVA                              |
|          | bottom left               | 0.304  |                               |         | one-way ANOVA                              |
|          | bottom right              | 0.464  |                               |         | one-way ANOVA                              |
| Fig S1D  | top                       | 0.797  |                               |         | two-way ANOVA                              |
|          | bottom                    | 0.9201 |                               |         | Kruskal-Wallis                             |
| Fig S1F  | left                      | 0.379  |                               |         | one-way ANOVA                              |
|          | middle                    | <0.001 |                               |         | one-way ANOVA                              |
|          | right                     | 0.2    |                               |         | Kruskal-Wallis                             |
| Fig S2D  | <0.0001                   |        | Cytoplasm vs. Chromatin       | <0.0001 | Kruskal-Wallis; Dunn's Multiple Comparison |
|          |                           |        | Cytoplasm vs. Spindle         | <0.0001 |                                            |
|          |                           |        | Cytoplasm vs. Centrosomes     | <0.0001 |                                            |
| Fig S6B  | <0.0001                   |        |                               |         | unpaired t-test                            |
| Fig S6D  | 0.1952                    |        |                               |         | unpaired t-test                            |
| Fig S9C  | 0.001                     |        | Parental vs. 7A11             | 0.0016  | one-way ANOVA; Tukey's Multiple Comparison |
|          |                           |        | Parental vs. 7H10             | 0.0016  |                                            |
|          |                           |        | Parental vs. B1H3             | 0.0016  |                                            |
| Fig S10E | 0.0009                    |        | Parental vs 7A11              | 0.0356  | one-way ANOVA; Tukey's Multiple Comparison |
|          |                           |        | Parental vs 7H10              | 0.0469  |                                            |
|          |                           |        | Parental vs B1H3              | 0.0004  |                                            |
| Fig S10F | 0.234                     |        |                               |         | Kruskal-Wallis                             |
| Fig S10G | <0.0001                   |        | Parental vs 7A11              | 0.01    | Kruskal-Wallis; Dunn's Multiple Comparison |
|          |                           |        | Parental vs 7H10              | <0.0001 |                                            |
|          |                           |        | Parental vs B1H3              | <0.0001 |                                            |

162  
163  
164

**Appendix Table S2. Statistical analysis used through the study.**

165 **Appendix Table S3**

|                                           | <b>NCP-CbNT</b>    | <b>NCP-APC3 loop</b> |
|-------------------------------------------|--------------------|----------------------|
| <b>Data collection and processing</b>     |                    |                      |
| Magnification                             | 150,000            | 165,000              |
| Voltage (kV)                              | 200                | 300                  |
| Electron exposure (e-/Å <sup>2</sup> )    | 60                 | 62                   |
| Defocus range (µm)                        | -0.6 to -1.6       | -0.6 to -1.6         |
| Pixel size (Å)                            | 0.94               | 0.52                 |
| Symmetry imposed                          | C1                 | C1                   |
| Initial particle images (no.)             | 1,201,152          | 2,698,450            |
| Final particle images (no.)               | 38,352             | 414,277              |
| Map resolution (Å)                        | 2.5                | 2.5                  |
| FSC threshold                             | 0.143              | 0.143                |
| <b>Refinement</b>                         |                    |                      |
| Initial model used (PDB code)             | 3LZ0               | 9FH9                 |
| Model resolution (Å)                      | 2.5                | 2.5                  |
| Map sharpening B factor (Å <sup>2</sup> ) | -22                | -50                  |
| <u>Model composition</u>                  |                    |                      |
| Nonhydrogen atoms                         | 11862              | 11519                |
| Protein residues                          | 747                | 762                  |
| Nucleotides                               | 290                | 290                  |
| <u>B factors (Å<sup>2</sup>)</u>          |                    |                      |
| Protein (min/max/mean)                    | 9.44/86.92/36.71   | 10.06/85.06/34.16    |
| Nucleotide (min/max/mean)                 | 13.40/206.15/84.84 | 29.26/133.94/69.73   |
| <u>R.m.s. deviations</u>                  |                    |                      |
| Bond lengths (Å)                          | 0.004              | 0.003                |
| Bond angles (°)                           | 0.627              | 0.564                |
| <b>Validation</b>                         |                    |                      |
| MolProbity score                          | 2                  | 1.19                 |
| Clashscore                                | 8.76               | 3.99                 |
| Poor rotamers (%)                         | 3.23               | 0.94                 |
| <u>Ramachandran plot</u>                  |                    |                      |
| Favored (%)                               | 97.25              | 98.52                |
| Allowed (%)                               | 2.75               | 1.48                 |
| Disallowed (%)                            | 0                  | 0                    |

166

167 **Appendix Table S3. Cryo-EM data collection, refinement and validation statistics**
